# Supplementary material for: Diachronic assessment of soil organic C and N dynamics under long-term no-till cropping systems in the tropical upland of Cambodia
Source: Copernicus journal article supplement (doi:10.5194/egusphere-2024-541), 2024-03-07
Supplement: Supplementary file 1 [file egusphere-2024-541-supplement.pdf]

## List of supplementary materials for SOC and TN dynamic paper

Table S1. Soil bulk density in 2009, 2011 and 2021.

| Experiments <sup>a</sup>                         | Soil depth<br>(cm) | Sampling years and cropping systems <sup>b</sup> |      |      |      |      |      |      |      |      |      |  |
|--------------------------------------------------|--------------------|--------------------------------------------------|------|------|------|------|------|------|------|------|------|--|
|                                                  |                    | 2009                                             |      | 2011 |      |      |      |      | 2021 |      |      |  |
|                                                  |                    | PE                                               | RV   | CT   | NT1  | NT2  | NT3  | CT   | NT1  | NT2  | NT3  |  |
| Bulk density ( $\rho_b$ ) ( $\text{g cm}^{-3}$ ) |                    |                                                  |      |      |      |      |      |      |      |      |      |  |
| MaiEx                                            | 0-5                | 1.11                                             | 1.00 | 1.17 | 1.20 | 1.20 | 1.21 | 1.14 | 1.08 | 1.10 | 1.10 |  |
|                                                  | 5-10               | 1.17                                             | 1.05 | 1.21 | 1.20 | 1.23 | 1.22 | 1.22 | 1.14 | 1.19 | 1.18 |  |
|                                                  | 10-20              | 1.24                                             | 1.10 | 1.20 | 1.20 | 1.18 | 1.22 | 1.19 | 1.15 | 1.13 | 1.19 |  |
|                                                  | 20-40              |                                                  | 1.14 | 1.07 | 1.10 | 1.13 | 1.08 | 1.01 | 0.98 | 0.98 | 1.00 |  |
|                                                  | 40-60              |                                                  | 1.12 | 1.00 | 1.05 | 1.03 | 1.09 | 0.90 | 0.90 | 0.97 | 0.94 |  |
|                                                  | 60-80              |                                                  | 1.05 | 1.11 | 1.05 | 1.09 | 1.13 | 0.92 | 0.93 | 0.99 | 0.94 |  |
|                                                  | 80-100             |                                                  | 1.06 | 1.10 | 1.08 | 1.16 | 1.15 | 0.95 | 0.95 | 1.02 | 0.96 |  |
| SoyEx                                            | 0-5                | 1.15                                             | 1.00 | 1.16 | 1.16 | 1.16 | 1.14 | 1.09 | 1.10 | 1.16 | 1.09 |  |
|                                                  | 5-10               | 1.24                                             | 1.05 | 1.22 | 1.25 | 1.19 | 1.18 | 1.25 | 1.19 | 1.19 | 1.16 |  |
|                                                  | 10-20              | 1.26                                             | 1.10 | 1.25 | 1.23 | 1.16 | 1.22 | 1.24 | 1.16 | 1.18 | 1.14 |  |
|                                                  | 20-40              |                                                  | 1.14 | 1.11 | 1.20 | 1.11 | 1.06 | 1.09 | 1.12 | 1.06 | 1.07 |  |
|                                                  | 40-60              |                                                  | 1.12 | 1.06 | 1.07 | 1.08 | 1.04 | 0.93 | 0.95 | 0.95 | 0.95 |  |
|                                                  | 60-80              |                                                  | 1.05 | 1.07 | 1.08 | 1.09 | 1.05 | 0.93 | 0.97 | 0.94 | 0.94 |  |
|                                                  | 80-100             |                                                  | 1.06 | 1.10 | 1.07 | 1.14 | 1.13 | 0.92 | 0.96 | 0.97 | 0.93 |  |
| CasEx                                            | 0-5                | 1.15                                             | 1.00 | 1.10 | 1.17 | 1.17 | 1.17 | 1.08 | 1.05 | 1.12 | 1.09 |  |
|                                                  | 5-10               | 1.20                                             | 1.05 | 1.11 | 1.19 | 1.18 | 1.18 | 1.20 | 1.12 | 1.21 | 1.22 |  |
|                                                  | 10-20              | 1.23                                             | 1.10 | 1.15 | 1.25 | 1.25 | 1.24 | 1.18 | 1.13 | 1.21 | 1.17 |  |
|                                                  | 20-40              |                                                  | 1.14 | 1.12 | 1.18 | 1.17 | 1.13 | 1.09 | 1.09 | 1.08 | 1.01 |  |
|                                                  | 40-60              |                                                  | 1.12 | 1.02 | 1.02 | 1.04 | 1.03 | 0.98 | 1.00 | 0.96 | 0.94 |  |
|                                                  | 60-80              |                                                  | 1.05 | 0.99 | 1.09 | 1.11 | 1.04 | 0.95 | 0.95 | 0.97 | 0.96 |  |
|                                                  | 80-100             |                                                  | 1.06 | 1.06 | 1.11 | 1.08 | 1.09 | 0.94 | 0.98 | 0.99 | 0.99 |  |

<sup>a</sup>Experiments: MaiEx = Maize-based experiment, SoyEx = Soybean-based experiment, and CasEx = Cassava-based experiment.

<sup>b</sup>Tillage systems: PE: pre-experiment (the samples were collected to 20 cm depth in 2009 prior to the establishment of the experiments); RV: reference vegetation; CT = conventional tillage, NT = no-till, NT1, NT2, and NT3 refer to no-till associated with cropping systems described in Table 1.

Table S2. Duplication of Fig. 1: Mean SOC concentration in bulk soil in 2011 and 2021.

| Experiments <sup>a</sup> | Soil depth (cm) | Cropping systems <sup>b</sup>                         |          |          |          |                                                       |          |          |          |
|--------------------------|-----------------|-------------------------------------------------------|----------|----------|----------|-------------------------------------------------------|----------|----------|----------|
|                          |                 | CT                                                    | NT1      | NT2      | NT3      | CT                                                    | NT1      | NT2      | NT3      |
|                          |                 | SOC concentration in 2011 (g C kg <sup>-1</sup> soil) |          |          |          | SOC concentration in 2021 (g C kg <sup>-1</sup> soil) |          |          |          |
| MaiEx                    | 0-5             | 19.68                                                 | 18.60 B  | 19.33 B  | 18.97 B  | 20.48 b                                               | 31.29 Aa | 29.23 Aa | 28.17 Aa |
|                          | 5-10            | 17.55                                                 | 16.28 B  | 16.43 B  | 16.02 B  | 19.41                                                 | 19.71 A  | 20.34 A  | 19.96 A  |
|                          | 10-20           | 14.50 B                                               | 13.90    | 13.03 B  | 13.05 B  | 16.78 A                                               | 14.87    | 15.42 A  | 14.62 A  |
|                          | 20-40           | 9.10                                                  | 8.02 B   | 7.42 B   | 8.63     | 9.44                                                  | 9.34 A   | 10.22 A  | 9.18     |
|                          | 40-60           | 6.47 a                                                | 5.45 Bb  | 6.08 b   | 5.84 b   | 6.34                                                  | 6.38     | 6.60     | 6.36     |
|                          | 60-80           | 4.87                                                  | 4.14 B   | 4.65     | 4.49     | 4.51                                                  | 5.08     | 4.89     | 4.72     |
|                          | 80-100          | 4.49 Aa                                               | 3.45 Bb  | 4.30 a   | 4.05 b   | 3.84 B                                                | 3.99     | 4.23     | 3.79     |
| SoyEx                    | 0-5             | 19.27                                                 | 19.92 B  | 20.82 B  | 20.12 B  | 19.70 b                                               | 27.45 Aa | 27.39 Aa | 28.31 Aa |
|                          | 5-10            | 18.60                                                 | 17.60    | 17.13    | 17.07    | 19.16                                                 | 17.39    | 19.83    | 19.79    |
|                          | 10-20           | 15.78                                                 | 15.65    | 14.22    | 15.47    | 16.87                                                 | 15.51    | 15.53    | 15.95    |
|                          | 20-40           | 9.71                                                  | 10.11    | 8.39     | 8.30     | 10.80 a                                               | 11.58 a  | 9.30 b   | 9.86 b   |
|                          | 40-60           | 6.44                                                  | 6.60     | 5.75     | 5.59     | 7.28                                                  | 7.61     | 6.50     | 6.49     |
|                          | 60-80           | 5.22                                                  | 5.57     | 4.42     | 4.33     | 5.39                                                  | 5.87     | 4.52     | 4.48     |
|                          | 80-100          | 4.83                                                  | 5.35     | 4.26     | 3.95     | 4.52                                                  | 4.67     | 3.54     | 3.78     |
| CasEx                    | 0-5             | 15.65 Bb                                              | 15.63 Bb | 17.98 Ba | 18.68 Ba | 17.59 Ab                                              | 19.75 Aa | 22.26 Aa | 24.32 Aa |
|                          | 5-10            | 16.42 B                                               | 15.23 B  | 16.68 B  | 16.08 B  | 17.28 A                                               | 18.26 A  | 18.36 A  | 18.06 A  |
|                          | 10-20           | 15.15 a                                               | 12.98 Bb | 14.45 ab | 13.05 Bb | 16.00                                                 | 15.47 A  | 15.18    | 14.80 A  |
|                          | 20-40           | 9.66 A                                                | 7.84 B   | 8.39 B   | 7.74 B   | 8.70 B                                                | 9.57 A   | 10.29 A  | 9.56 A   |
|                          | 40-60           | 6.68                                                  | 5.82 B   | 6.22     | 5.79 B   | 6.79                                                  | 6.88 A   | 6.68     | 6.64 A   |
|                          | 60-80           | 5.34                                                  | 4.92 B   | 5.47     | 4.98     | 5.66                                                  | 5.41 A   | 5.28     | 5.19     |
|                          | 80-100          | 5.12                                                  | 4.47     | 5.01 A   | 4.63 A   | 5.03                                                  | 4.46     | 4.41 B   | 4.03 B   |

<sup>a</sup> MaiEx: Maize-based experiment; SoyEx: Soybean-based experiment; and CasEx: Cassava-based experiment.

<sup>b</sup>CT: conventional tillage; NT: no-till, NT1, NT2, and NT3 refer to no-till associated with cropping systems as described in Table 1. The same letters accompanying the values indicate there is no significant difference within the same treatment and depth between 2011 and 2021 (uppercase letters) and between the treatments within the same sampling date (lowercase letters) at the same soil depth at  $P \leq 0.05$  (Tukey's test).

Table S3. Duplication of Fig. 2: Mean total N concentration in bulk soil in 2011 and 2021.

| Experiments <sup>a</sup> | Soil depth (cm) | Cropping systems <sup>b</sup>                       |         |          |         |                                                     |          |          |         |
|--------------------------|-----------------|-----------------------------------------------------|---------|----------|---------|-----------------------------------------------------|----------|----------|---------|
|                          |                 | CT                                                  | NT1     | NT2      | NT3     | CT                                                  | NT1      | NT2      | NT3     |
|                          |                 | N concentration in 2011 (g N kg <sup>-1</sup> soil) |         |          |         | N concentration in 2021 (g N kg <sup>-1</sup> soil) |          |          |         |
| MaiEx                    | 0-5             | 1.82                                                | 1.88 B  | 1.89 B   | 1.96 B  | 1.65 b                                              | 2.70 Aa  | 2.58 Aa  | 2.49 Aa |
|                          | 5-10            | 1.64                                                | 1.66    | 1.71     | 1.79    | 1.50 b                                              | 1.71 ab  | 1.91 ab  | 1.98 a  |
|                          | 10-20           | 1.34                                                | 1.46    | 1.47     | 1.46    | 1.46                                                | 1.32     | 1.76     | 1.41    |
|                          | 20-40           | 1.13                                                | 1.08    | 1.06     | 1.15    | 0.98                                                | 0.99     | 1.08     | 1.08    |
|                          | 40-60           | 0.88 A                                              | 0.92 A  | 0.99 A   | 0.99 A  | 0.78 B                                              | 0.70 B   | 0.79 B   | 0.83 B  |
|                          | 60-80           | 0.77                                                | 0.80    | 0.87 A   | 0.88 A  | 0.66                                                | 0.86     | 0.66 B   | 0.72 B  |
|                          | 80-100          | 0.71 A                                              | 0.76    | 0.85 A   | 0.79 A  | 0.53 B                                              | 0.64     | 0.69 B   | 0.63 B  |
| SoyEx                    | 0-5             | 1.87                                                | 1.92 B  | 2.02 B   | 1.95 B  | 1.70 b                                              | 2.39 Aa  | 2.36 Aa  | 2.50 Aa |
|                          | 5-10            | 1.65                                                | 1.67    | 1.72     | 1.72    | 2.15                                                | 1.56     | 1.79     | 1.85    |
|                          | 10-20           | 1.39                                                | 1.53    | 1.47     | 1.61    | 1.51                                                | 1.42     | 1.62     | 1.48    |
|                          | 20-40           | 1.07                                                | 1.22    | 1.20     | 1.19    | 1.16                                                | 1.19     | 1.09     | 1.10    |
|                          | 40-60           | 0.95                                                | 1.01    | 0.98 A   | 0.94    | 0.89                                                | 0.93     | 0.82 B   | 0.85    |
|                          | 60-80           | 0.85                                                | 0.94 A  | 0.88     | 0.86 A  | 0.73                                                | 0.72 B   | 0.78     | 0.72 B  |
|                          | 80-100          | 0.77                                                | 0.90 A  | 0.85 A   | 0.82    | 0.79 a                                              | 0.64 Bab | 0.58 Bb  | 0.71 ab |
| CasEx                    | 0-5             | 1.57 b                                              | 1.74 ab | 1.70 Bab | 1.90 Ba | 1.58 c                                              | 1.75 cb  | 1.99 Aab | 2.18 Aa |
|                          | 5-10            | 1.69 ab                                             | 1.72 a  | 1.53 Bb  | 1.67 ab | 1.58                                                | 1.69     | 1.68 A   | 1.69    |
|                          | 10-20           | 1.52                                                | 1.54 A  | 1.37     | 1.44    | 1.47                                                | 1.29 B   | 1.45     | 1.46    |
|                          | 20-40           | 1.21 A                                              | 1.20 A  | 1.02 B   | 1.12    | 1.04 B                                              | 1.08 B   | 1.21 A   | 1.12    |
|                          | 40-60           | 1.01 ab                                             | 1.07 Aa | 0.88 b   | 0.97 ab | 0.92                                                | 0.95 B   | 0.88     | 0.94    |
|                          | 60-80           | 0.90                                                | 0.99 A  | 0.80     | 0.90    | 0.73                                                | 0.77 B   | 0.84     | 0.80    |
|                          | 80-100          | 0.83                                                | 0.92 A  | 0.80     | 0.81    | 0.76                                                | 0.69 B   | 0.68     | 0.74    |

<sup>a</sup>MaiEx: Maize-based experiment; SoyEx: Soybean-based experiment; and CasEx: Cassava-based experiment.

<sup>b</sup>CT: conventional tillage; NT: no-till, NT1, NT2, and NT3 refer to no-till associated with cropping systems as described in Table 1. The same letters accompanying the values indicate there is no significant difference within the same treatment and depth between 2011 and 2021 (uppercase letters) and between the treatments within the same sampling date (lowercase letters) at the same soil depth at  $P \leq 0.05$  (Tukey's test).

Table S4. Mean SOC and total N stocks per soil layer in 2011.

| Experiments <sup>a</sup> | Approximate soil depth (cm) | Cropping systems                           |          |           |           |                                                |          |          |         |
|--------------------------|-----------------------------|--------------------------------------------|----------|-----------|-----------|------------------------------------------------|----------|----------|---------|
|                          |                             | CT                                         | NT1      | NT2       | NT3       | CT                                             | NT1      | NT2      | NT3     |
|                          |                             | SOC stock in 2011 (Mg C ha <sup>-1</sup> ) |          |           |           | Total N stock in 2011 (Mg N ha <sup>-1</sup> ) |          |          |         |
| MaiEx                    | 0-5                         | 9.45                                       | 8.93 B   | 9.28 B    | 9.10 B    | 0.87                                           | 0.90 B   | 0.91 B   | 0.94 B  |
|                          | 5-10                        | 9.29 B                                     | 8.70 B   | 8.85 B    | 8.67 B    | 0.87                                           | 0.88     | 0.91     | 0.95    |
|                          | 10-20                       | 15.99 B                                    | 15.24    | 14.58 B   | 14.46 B   | 1.48                                           | 1.58     | 1.61     | 1.62    |
|                          | 20-40                       | 18.83                                      | 17.05    | 15.81 B   | 17.92     | 2.19                                           | 2.16     | 2.12     | 2.27    |
|                          | 40-60                       | 13.00 a                                    | 11.35 ab | 11.71 bc  | 12.13 c   | 1.71 A                                         | 1.73 A   | 1.80 A   | 1.86 A  |
|                          | 60-80                       | 10.19 Aa                                   | 8.90 a   | 9.82 a    | 9.52 b    | 1.49 A                                         | 1.60     | 1.69 A   | 1.72 A  |
|                          | 80-100                      | 8.44 Aa                                    | 6.99 a   | 8.15 ab   | 7.89 b    | 1.33 A                                         | 1.41     | 1.55 A   | 1.54 A  |
|                          | 0-100                       | 85.18                                      | 77.16 B  | 78.19 B   | 79.68 B   | 9.94                                           | 10.26    | 10.58    | 10.89   |
| SoyEx                    | 0-5                         | 9.25 a                                     | 9.56 Ba  | 9.99 Ba   | 9.65 Ba   | 0.90                                           | 0.92 B   | 0.97 B   | 0.93 B  |
|                          | 5-10                        | 9.70 b                                     | 9.35 a   | 9.25 Ba   | 9.11 Bab  | 0.88                                           | 0.89     | 0.92     | 0.91    |
|                          | 10-20                       | 17.28 a                                    | 17.03 a  | 15.61 a   | 16.68 a   | 1.53 B                                         | 1.66     | 1.60     | 1.73    |
|                          | 20-40                       | 20.42 a                                    | 20.99 a  | 17.32 a   | 17.87 a   | 2.12                                           | 2.41     | 2.32     | 2.36    |
|                          | 40-60                       | 13.82 ab                                   | 14.83 a  | 11.73 b   | 11.39 b   | 1.76                                           | 1.98     | 1.88     | 1.80    |
|                          | 60-80                       | 10.76 a                                    | 11.39 a  | 9.33 a    | 8.96 a    | 1.64 A                                         | 1.80 A   | 1.69 A   | 1.63 A  |
|                          | 80-100                      | 9.21 a                                     | 9.87 a   | 7.81 a    | 7.46 a    | 1.47                                           | 1.65 A   | 1.56 A   | 1.49 A  |
|                          | 0-100                       | 90.44                                      | 93.00    | 81.05     | 81.12     | 10.29                                          | 11.29 A  | 10.93    | 10.86   |
| CasEx                    | 0-5                         | 7.51 Bb                                    | 7.50 Bb  | 8.63 Ba   | 8.97 Ba   | 0.75 b                                         | 0.84 ab  | 0.82 Bab | 0.91 Ba |
|                          | 5-10                        | 8.44 Bab                                   | 7.93 Bb  | 8.78 Ba   | 8.60 Bab  | 0.87 ab                                        | 0.89 ab  | 0.81 Bb  | 0.89 ab |
|                          | 10-20                       | 16.23 Ba                                   | 14.19 Bb | 15.74 Bab | 14.40 Bab | 1.63 ab                                        | 1.67 Aa  | 1.49 b   | 1.57 ab |
|                          | 20-40                       | 19.11                                      | 16.59 B  | 17.88 B   | 16.39 B   | 2.33 Aa                                        | 2.37 Aa  | 2.03 Bb  | 2.22 a  |
|                          | 40-60                       | 13.57                                      | 11.99    | 12.78     | 11.74     | 1.90 Aab                                       | 2.00 Aa  | 1.68 a   | 1.83 ab |
|                          | 60-80                       | 10.91                                      | 9.92     | 10.73     | 9.75      | 1.72 A                                         | 1.88 A   | 1.54     | 1.71    |
|                          | 80-100                      | 9.32                                       | 8.61     | 9.58 A    | 8.71 A    | 1.55 a                                         | 1.76 Aa  | 1.42 b   | 1.55 ab |
|                          | 0-100                       | 85.09                                      | 76.74 B  | 84.10 B   | 78.55 B   | 10.75 A                                        | 11.41 Av | 9.78     | 10.68   |

<sup>a</sup>Experiments: MaiEx = Maize-based experiment, SoyEx = Soybean-based experiment, and CasEx = Cassava-based experiment.

<sup>b</sup>Cropping systems: CT = conventional tillage, NT = no-till, NT1, NT2, and NT3 refer to no-till associated with cropping systems as described in Table 1. At the same soil depth, the uppercase letter(s) accompanying the values of the same treatment refer to the significant difference between 2011 and 2021 at  $P \leq 0.05$  (Tukey's test). The lowercase letter(s) accompanying the values in the same year and at the same soil depth indicate the significant difference among the cropping systems (CT, NT1, NT2, and NT3) at  $P \leq 0.05$  (Tukey's test).

Table S5. Duplication of Fig. 4: C concentration in POM fraction (> 53  $\mu\text{m}$ ) in 2011 and 2021.

| Experiments <sup>a</sup> | Soil depth (cm) | Cropping systems <sup>b</sup>                              |        |        |        |                                                            |         |         |          |
|--------------------------|-----------------|------------------------------------------------------------|--------|--------|--------|------------------------------------------------------------|---------|---------|----------|
|                          |                 | CT                                                         | NT1    | NT2    | NT3    | CT                                                         | NT1     | NT2     | NT3      |
|                          |                 | C concentration in POM in 2011 (g C kg <sup>-1</sup> soil) |        |        |        | C concentration in POM in 2021 (g C kg <sup>-1</sup> soil) |         |         |          |
| MaiEx                    | 0-5             | 1.39                                                       | 1.46 B | 1.67 B | 1.69 B | 1.76 c                                                     | 4.76 Ab | 3.63 Ab | 3.81 Aa  |
|                          | 5-10            | 0.92 B                                                     | 0.82 B | 0.95 B | 0.86   | 1.32 A                                                     | 1.30 A  | 1.40 A  | 1.11     |
|                          | 10-20           | 0.55 B                                                     | 0.56   | 0.46   | 0.47   | 0.83 Aa                                                    | 0.51 b  | 0.57 ab | 0.55 ab  |
|                          | 20-40           | 0.17                                                       | 0.18   | 0.15 B | 0.20   | 0.21                                                       | 0.19    | 0.26 A  | 0.18     |
|                          | 40-60           | 0.09                                                       | 0.08   | 0.11   | 0.08   | 0.08                                                       | 0.10    | 0.11    | 0.09     |
|                          | 60-80           | 0.07                                                       | 0.08   | 0.09   | 0.06   | 0.06                                                       | 0.08    | 0.06    | 0.06     |
|                          | 80-100          | 0.07                                                       | 0.07   | 0.07   | 0.05   | 0.05                                                       | 0.06    | 0.09    | 0.04     |
| SoyEx                    | 0-5             | 1.37                                                       | 1.35 B | 1.60 B | 1.65 B | 1.65 c                                                     | 4.24 Aa | 3.32 Ab | 3.69 Aab |
|                          | 5-10            | 0.83 B                                                     | 0.71 B | 0.73 B | 0.82 B | 1.18 Ab                                                    | 1.42 Ab | 1.17 Ab | 1.10 Aa  |
|                          | 10-20           | 0.58 B                                                     | 0.54 B | 0.55   | 0.56   | 0.77                                                       | 0.93 A  | 0.64    | 0.64     |
|                          | 20-40           | 0.22                                                       | 0.27   | 0.17   | 0.20   | 0.21                                                       | 0.31    | 0.18    | 0.19     |
|                          | 40-60           | 0.08                                                       | 0.16   | 0.07   | 0.09   | 0.10                                                       | 0.12    | 0.11    | 0.09     |
|                          | 60-80           | 0.06                                                       | 0.06   | 0.05   | 0.10   | 0.06                                                       | 0.08    | 0.07    | 0.07     |
|                          | 80-100          | 0.07                                                       | 0.07   | 0.06   | 0.07 A | 0.06                                                       | 0.06    | 0.04    | 0.04 B   |
| CasEx                    | 0-5             | 0.84                                                       | 0.85   | 1.03   | 1.98   | 1.01 b                                                     | 1.40 ab | 1.96 ab | 2.79 a   |
|                          | 5-10            | 0.89                                                       | 0.81   | 1.11   | 0.82   | 0.88                                                       | 0.89    | 1.04    | 0.98     |
|                          | 10-20           | 0.64                                                       | 0.54   | 0.62   | 0.52   | 0.70                                                       | 0.53    | 0.57    | 0.54     |
|                          | 20-40           | 0.21 A                                                     | 0.15 B | 0.22   | 0.13 B | 0.16 B                                                     | 0.19 A  | 0.23    | 0.20 A   |
|                          | 40-60           | 0.10                                                       | 0.08   | 0.08   | 0.09   | 0.10                                                       | 0.09    | 0.09    | 0.10     |
|                          | 60-80           | 0.07                                                       | 0.06   | 0.11 A | 0.06   | 0.09                                                       | 0.05    | 0.07 B  | 0.06     |
|                          | 80-100          | 0.09                                                       | 0.07   | 0.13   | 0.15   | 0.09                                                       | 0.07    | 0.07    | 0.05     |

<sup>a</sup> Experiments: MaiEx = Maize-based experiment, SoyEx = Soybean-based experiment, and CasEx = Cassava-based experiment.

<sup>b</sup> Cropping systems: CT = conventional tillage, NT = no-till, NT1, NT2, and NT3 refer to no-till associated with cropping systems as described in Table 1. At the same soil depth, the uppercase letter(s) accompanying the values of the same treatment refer to the significant difference between 2011 and 2021 at  $P \leq 0.05$  (Tukey's test). The lowercase letter(s) accompanying the values in the same year and at the same soil depth indicate the significant difference among the cropping systems (CT, NT1, NT2, and NT3) at  $P \leq 0.05$  (Tukey's test).

Table S6. Duplication of Fig. 4: C concentration in MAOM fraction (< 53 µm) in 2011 and 2021.

| Experiments <sup>a</sup> | Soil depth (cm) | Cropping systems <sup>b</sup>                               |          |           |           |                                                             |          |          |          |
|--------------------------|-----------------|-------------------------------------------------------------|----------|-----------|-----------|-------------------------------------------------------------|----------|----------|----------|
|                          |                 | CT                                                          | NT1      | NT2       | NT3       | CT                                                          | NT1      | NT2      | NT3      |
|                          |                 | C concentration in MAOM in 2011 (g C kg <sup>-1</sup> soil) |          |           |           | C concentration in MAOM in 2021 (g C kg <sup>-1</sup> soil) |          |          |          |
| MaiEx                    | 0-5             | 15.15                                                       | 15.58 B  | 15.92 B   | 15.29 B   | 16.64 b                                                     | 23.31 Aa | 22.73 Aa | 22.19 Aa |
|                          | 5-10            | 14.09 B                                                     | 14.32 B  | 14.10 B   | 13.39 B   | 16.08 A                                                     | 16.74 A  | 17.07 A  | 15.96 A  |
|                          | 10-20           | 11.77 B                                                     | 12.38    | 11.36     | 11.19     | 13.99 A                                                     | 13.17    | 13.16    | 12.57    |
|                          | 20-40           | 7.51                                                        | 7.22 B   | 6.54 B    | 7.29      | 8.18                                                        | 8.23 A   | 8.97 A   | 8.01     |
|                          | 40-60           | 5.48                                                        | 5.04 B   | 5.49      | 5.11      | 5.50                                                        | 5.65 A   | 5.84     | 5.52     |
|                          | 60-80           | 4.30                                                        | 3.96     | 4.22      | 4.00      | 4.02                                                        | 4.35     | 4.34     | 4.19     |
|                          | 80-100          | 3.77 A                                                      | 3.26     | 3.90      | 3.21      | 3.37 B                                                      | 3.53     | 3.76     | 3.29     |
| SoyEx                    | 0-5             | 15.60                                                       | 16.69 B  | 17.26 B   | 16.84 B   | 16.48 b                                                     | 21.30 Aa | 21.06 Aa | 20.97 Aa |
|                          | 5-10            | 15.22                                                       | 15.26    | 14.72     | 14.55 B   | 16.09                                                       | 16.80    | 16.31    | 18.71 A  |
|                          | 10-20           | 13.38 B                                                     | 13.76 B  | 12.41 B   | 12.84 B   | 14.39 A                                                     | 14.39 A  | 13.44 A  | 13.76 A  |
|                          | 20-40           | 8.35                                                        | 8.95     | 7.45      | 7.28      | 9.20                                                        | 9.87     | 8.10     | 8.50     |
|                          | 40-60           | 5.34 B                                                      | 6.13 B   | 5.20      | 5.03 B    | 5.96 A                                                      | 6.66 A   | 5.62     | 5.66 A   |
|                          | 60-80           | 5.02                                                        | 5.10     | 4.09      | 3.89      | 4.57                                                        | 5.03     | 3.99     | 4.03     |
|                          | 80-100          | 4.32 A                                                      | 4.85 A   | 3.83 A    | 3.56      | 3.77 B                                                      | 4.08 B   | 3.11 B   | 3.43     |
| CasEx                    | 0-5             | 13.74 Bb                                                    | 13.64 Bb | 15.25 Ba  | 14.51 Bab | 14.79 Ac                                                    | 16.75 Ab | 18.52 Aa | 19.00 Aa |
|                          | 5-10            | 13.86 B                                                     | 13.16 B  | 14.57 B   | 13.56 B   | 14.72 A                                                     | 15.74 A  | 15.85 A  | 15.38 A  |
|                          | 10-20           | 13.12 Ba                                                    | 11.27 Bb | 12.80 Bab | 11.31 Bb  | 13.79 A                                                     | 13.61 A  | 13.45 A  | 12.84 A  |
|                          | 20-40           | 8.56                                                        | 6.86 B   | 7.48 B    | 6.49 B    | 7.80                                                        | 8.44 A   | 8.91 A   | 8.37 A   |
|                          | 40-60           | 5.90                                                        | 5.17 B   | 5.58      | 4.94 B    | 5.76                                                        | 6.09 A   | 5.92     | 5.93 A   |
|                          | 60-80           | 4.76                                                        | 4.38 B   | 4.83      | 4.25      | 4.93                                                        | 4.86 A   | 4.77     | 4.55     |
|                          | 80-100          | 4.62                                                        | 4.03     | 4.52 A    | 3.99      | 4.43                                                        | 4.06     | 3.50 B   | 3.94     |

<sup>a</sup> Experiments: MaiEx = Maize-based experiment, SoyEx = Soybean-based experiment, and CasEx = Cassava-based experiment.

<sup>b</sup> Cropping systems: CT = conventional tillage, NT = no-till, NT1, NT2, and NT3 refer to no-till associated with cropping systems as described in Table 1. At the same soil depth, the uppercase letter(s) accompanying the values of the same treatment refer to the significant difference between 2011 and 2021 at  $P \leq 0.05$  (Tukey's test). The lowercase letter(s) accompanying the values in the same year and at the same soil depth indicate the significant difference among the cropping systems (CT, NT1, NT2, and NT3) at  $P \leq 0.05$  (Tukey's test).

Table S7. Duplication of Fig. 5: N concentration in POM fraction (> 53  $\mu\text{m}$ ) in 2011 and 2021.

| Experiments <sup>a</sup> | Soil depth (cm) | Cropping systems <sup>b</sup>                              |         |         |         |                                                            |          |           |           |
|--------------------------|-----------------|------------------------------------------------------------|---------|---------|---------|------------------------------------------------------------|----------|-----------|-----------|
|                          |                 | CT                                                         | NT1     | NT2     | NT3     | CT                                                         | NT1      | NT2       | NT3       |
|                          |                 | N concentration in POM in 2011 (g N kg <sup>-1</sup> soil) |         |         |         | N concentration in POM in 2021 (g N kg <sup>-1</sup> soil) |          |           |           |
| MaiEx                    | 0-5             | 0.086                                                      | 0.087 B | 0.100 B | 0.101 B | 0.107 c                                                    | 0.311 Aa | 0.241 Ab  | 0.254 Ab  |
|                          | 5-10            | 0.056                                                      | 0.046 B | 0.048 B | 0.052   | 0.073                                                      | 0.075 A  | 0.084 A   | 0.067     |
|                          | 10-20           | 0.032                                                      | 0.030   | 0.028   | 0.028   | 0.043                                                      | 0.023    | 0.029     | 0.026     |
|                          | 20-40           | 0.010                                                      | 0.008   | 0.011   | 0.016   | 0.010                                                      | 0.008    | 0.013     | 0.009     |
|                          | 40-60           | 0.008 A                                                    | 0.006 A | 0.010 A | 0.007 A | 0.003B                                                     | 0.005 B  | 0.005 B   | 0.004 B   |
|                          | 60-80           | 0.008 A                                                    | 0.007   | 0.013 A | 0.006   | 0.003 B                                                    | 0.003    | 0.003 B   | 0.003     |
|                          | 80-100          | 0.008 A                                                    | 0.008 A | 0.008 A | 0.005   | 0.002 B                                                    | 0.002 B  | 0.005 B   | 0.002     |
| SoyEx                    | 0-5             | 0.076                                                      | 0.079 B | 0.096 B | 0.092 B | 0.104 c                                                    | 0.276 Aa | 0.218 Aab | 0.227 Aab |
|                          | 5-10            | 0.052 B                                                    | 0.036 B | 0.036 B | 0.043 B | 0.071 Ab                                                   | 0.081 Aa | 0.065 Aa  | 0.056 Ab  |
|                          | 10-20           | 0.029 B                                                    | 0.026 B | 0.025   | 0.027   | 0.045 A                                                    | 0.048 A  | 0.030     | 0.027     |
|                          | 20-40           | 0.010                                                      | 0.009   | 0.008   | 0.009   | 0.004                                                      | 0.013    | 0.008     | 0.007     |
|                          | 40-60           | 0.006                                                      | 0.006   | 0.007   | 0.006   | 0.003                                                      | 0.005    | 0.005     | 0.004     |
|                          | 60-80           | 0.006                                                      | 0.006 A | 0.005   | 0.008 A | 0.002                                                      | 0.004 B  | 0.003     | 0.003 B   |
|                          | 80-100          | 0.006 A                                                    | 0.006 A | 0.005   | 0.006 A | 0.004 B                                                    | 0.003 B  | 0.003     | 0.002 B   |
| CasEx                    | 0-5             | 0.046                                                      | 0.048   | 0.061   | 0.129   | 0.054 b                                                    | 0.086 ab | 0.123 ab  | 0.161 a   |
|                          | 5-10            | 0.049                                                      | 0.046   | 0.064   | 0.045   | 0.044                                                      | 0.051    | 0.060     | 0.053     |
|                          | 10-20           | 0.032                                                      | 0.029   | 0.031   | 0.024   | 0.035                                                      | 0.026    | 0.030     | 0.026     |
|                          | 20-40           | 0.013                                                      | 0.009   | 0.012   | 0.009   | 0.007                                                      | 0.008    | 0.009     | 0.009     |
|                          | 40-60           | 0.006                                                      | 0.006 A | 0.006   | 0.008   | 0.004                                                      | 0.004 B  | 0.007     | 0.005     |
|                          | 60-80           | 0.005 B                                                    | 0.005   | 0.008   | 0.007   | 0.006 A                                                    | 0.002    | 0.004     | 0.003     |
|                          | 80-100          | 0.006                                                      | 0.006   | 0.010   | 0.018 A | 0.007                                                      | 0.004    | 0.002     | 0.003 B   |

<sup>a</sup> Experiments: MaiEx = Maize-based experiment, SoyEx = Soybean-based experiment, and CasEx = Cassava-based experiment.

<sup>b</sup> Cropping systems: CT = conventional tillage, NT = no-till, NT1, NT2, and NT3 refer to no-till associated with cropping systems as described in Table 1. At the same soil depth, the uppercase letter(s) accompanying the values of the same treatment refer to the significant difference between 2011 and 2021 at  $P \leq 0.05$  (Tukey's test). The lowercase letter(s) accompanying the values in the same year and at the same soil depth indicate the significant difference among the cropping systems (CT, NT1, NT2, and NT3) at  $P \leq 0.05$  (Tukey's test).

Table S8. Duplication of Fig. 5: N concentration in MAOM fraction (< 53 µm) in 2011 and 2021.

| Experiments <sup>a</sup> | Soil depth (cm) | Cropping systems <sup>b</sup>                               |          |          |         |                                                             |          |          |         |
|--------------------------|-----------------|-------------------------------------------------------------|----------|----------|---------|-------------------------------------------------------------|----------|----------|---------|
|                          |                 | CT                                                          | NT1      | NT2      | NT3     | CT                                                          | NT1      | NT2      | NT3     |
|                          |                 | N concentration in MAOM in 2011 (g N kg <sup>-1</sup> soil) |          |          |         | N concentration in MAOM in 2021 (g N kg <sup>-1</sup> soil) |          |          |         |
| MaiEx                    | 0-5             | 1.22                                                        | 1.57     | 1.93     | 1.55    | 1.29 b                                                      | 2.02 a   | 2.28 a   | 1.73 ab |
|                          | 5-10            | 1.25 b                                                      | 1.27 b   | 1.86 Aa  | 1.44 b  | 1.40                                                        | 1.43     | 1.33 B   | 1.26    |
|                          | 10-20           | 1.10 b                                                      | 1.21 b   | 1.69 Aa  | 1.24 b  | 1.21                                                        | 1.14     | 0.86 B   | 1.04    |
|                          | 20-40           | 0.85 b                                                      | 0.93 b   | 1.33 Aa  | 0.95 Ab | 0.84                                                        | 0.75     | 0.75 B   | 0.64 B  |
|                          | 40-60           | 0.78 Ab                                                     | 0.73 b   | 1.24 Aa  | 0.87 Ab | 0.55 B                                                      | 0.59     | 0.50 B   | 0.39 B  |
|                          | 60-80           | 0.69                                                        | 0.75     | 1.06 A   | 0.72 A  | 0.38 ab                                                     | 0.50 a   | 0.35 Bab | 0.00 Bb |
|                          | 80-100          | 0.57 b                                                      | 0.73 Ab  | 1.13 Aa  | 0.62 Ab | 0.37                                                        | 0.35 B   | 0.33 B   | 0.23 B  |
| SoyEx                    | 0-5             | 1.44                                                        | 1.56     | 1.73     | 1.64    | 1.25 b                                                      | 1.76 a   | 1.75 a   | 1.67 a  |
|                          | 5-10            | 1.40 A                                                      | 1.33     | 1.44     | 1.43    | 1.07 Bb                                                     | 1.40 a   | 1.28 a   | 1.49 a  |
|                          | 10-20           | 1.33                                                        | 1.24     | 1.39     | 1.24    | 1.01                                                        | 1.32     | 1.04     | 1.02    |
|                          | 20-40           | 0.96                                                        | 1.15     | 1.00     | 0.83    | 0.72                                                        | 0.90     | 0.72     | 0.69    |
|                          | 40-60           | 0.79 A                                                      | 0.77 A   | 0.84 A   | 0.61    | 0.54 B                                                      | 0.58 B   | 0.48 B   | 0.49    |
|                          | 60-80           | 0.79 A                                                      | 0.74 A   | 0.74 A   | 0.57    | 0.46 B                                                      | 0.44 B   | 0.33 B   | 0.38    |
|                          | 80-100          | 0.71 A                                                      | 0.67 A   | 0.70 A   | 0.49 A  | 0.30 B                                                      | 0.34 B   | 0.28 B   | 0.29 B  |
| CasEx                    | 0-5             | 1.34 A                                                      | 1.40     | 1.43     | 1.60    | 1.07 Bb                                                     | 1.26 ab  | 1.42 a   | 1.48 a  |
|                          | 5-10            | 1.43 A                                                      | 1.41 A   | 1.40 A   | 1.62 A  | 1.09 B                                                      | 1.22 B   | 1.21 B   | 1.12 B  |
|                          | 10-20           | 1.33 A                                                      | 1.22 A   | 1.27 A   | 1.40 A  | 1.06 B                                                      | 1.04 B   | 1.00 B   | 0.93 B  |
|                          | 20-40           | 1.03 Aa                                                     | 0.85 Ab  | 0.99 Aab | 1.12 Aa | 0.65 B                                                      | 0.63 B   | 0.71 B   | 0.59 B  |
|                          | 40-60           | 0.92 Aab                                                    | 0.79 Ab  | 0.77 Ab  | 0.98 Aa | 0.46 Bab                                                    | 0.39 Bab | 0.56 Ba  | 0.31 Bb |
|                          | 60-80           | 0.80 Aab                                                    | 0.63 Ab  | 0.65 Ab  | 0.92 Aa | 0.38 B                                                      | 0.35 B   | 0.38 B   | 0.27 B  |
|                          | 80-100          | 0.77 Aab                                                    | 0.73 Aab | 0.62 Ab  | 0.88 Aa | 0.38 B                                                      | 0.30 B   | 0.30 B   | 0.27 B  |

<sup>a</sup> Experiments: MaiEx = Maize-based experiment, SoyEx = Soybean-based experiment, and CasEx = Cassava-based experiment.

<sup>b</sup> Cropping systems: CT = conventional tillage, NT = no-till, NT1, NT2, and NT3 refer to no-till associated with cropping systems as described in Table 1. At the same soil depth, the uppercase letter(s) accompanying the values of the same treatment refer to the significant difference between 2011 and 2021 at  $P \leq 0.05$  (Tukey's test). The lowercase letter(s) accompanying the values in the same year and at the same soil depth indicate the significant difference among the cropping systems (CT, NT1, NT2, and NT3) at  $P \leq 0.05$  (Tukey's test).

Table S9. Cumulative SOC stock in 2011.

| Experiments <sup>a</sup>                              | Approximate soil depth (cm) | Cropping systems <sup>b</sup> |          |           |          |
|-------------------------------------------------------|-----------------------------|-------------------------------|----------|-----------|----------|
|                                                       |                             | CT                            | NT1      | NT2       | NT3      |
| Cumulative SOC stock in 2011 (Mg C ha <sup>-1</sup> ) |                             |                               |          |           |          |
| MaiEx                                                 | 0-10                        | 18.74 B                       | 17.63 B  | 18.12 B   | 17.77 B  |
|                                                       | 0-20                        | 34.73 B                       | 32.87 B  | 32.71 B   | 32.23 B  |
|                                                       | 0-40                        | 53.56 B                       | 49.92 B  | 48.51 B   | 50.15 B  |
|                                                       | 0-60                        | 66.55                         | 61.27 B  | 60.22 B   | 62.28 B  |
|                                                       | 0-80                        | 76.74                         | 70.17 B  | 70.04 B   | 71.80 B  |
|                                                       | 0-100                       | 85.18                         | 77.16 B  | 78.19 B   | 79.68 B  |
| SoyEx                                                 | 0-10                        | 18.95                         | 18.91 B  | 19.23 B   | 18.77 B  |
|                                                       | 0-20                        | 36.23                         | 35.94 B  | 34.85 B   | 35.44 B  |
|                                                       | 0-40                        | 56.65                         | 56.92    | 52.17 B   | 53.31 B  |
|                                                       | 0-60                        | 70.47                         | 71.75    | 63.90 B   | 64.70 B  |
|                                                       | 0-80                        | 81.23                         | 83.14    | 73.24 B   | 73.66 B  |
|                                                       | 0-100                       | 90.44                         | 93.00    | 81.05     | 81.12    |
| CasEx                                                 | 0-10                        | 15.95 Bab                     | 15.44 Bb | 17.41 Bab | 17.57 Ba |
|                                                       | 0-20                        | 32.18 B                       | 29.63 B  | 33.14 B   | 31.97 B  |
|                                                       | 0-40                        | 51.29                         | 46.22 B  | 51.02 B   | 48.36 B  |
|                                                       | 0-60                        | 64.86                         | 58.21 B  | 63.80 B   | 60.10 B  |
|                                                       | 0-80                        | 75.77                         | 68.13 B  | 74.53 B   | 69.85 B  |
|                                                       | 0-100                       | 85.09                         | 76.74 B  | 84.10 B   | 78.55 B  |

<sup>a</sup>Experiments: MaiEx = Maize-based experiment, SoyEx = Soybean-based experiment, and CasEx = Cassava-based experiment.

<sup>b</sup>Cropping systems: CT = conventional tillage, NT = no-till, NT1, NT2, and NT3 refer to no-till associated with cropping systems as described in Table 1. At the same soil depth, the uppercase letter(s) accompanying the values of the same treatment refer to the significant difference between 2011 and 2021 at  $P \leq 0.05$  (Tukey's test). The lowercase letter(s) accompanying the values in the same year and at the same soil depth indicate the significant difference among the cropping systems (CT, NT1, NT2, and NT3) at  $P \leq 0.05$  (Tukey's test).
